# Supplementary material
Source: Springer Nature journal article supplement (https://www.springermedizin.de/resource/supplementary/12985_2009_574_MOESM5_ESM.pdf/9608482)

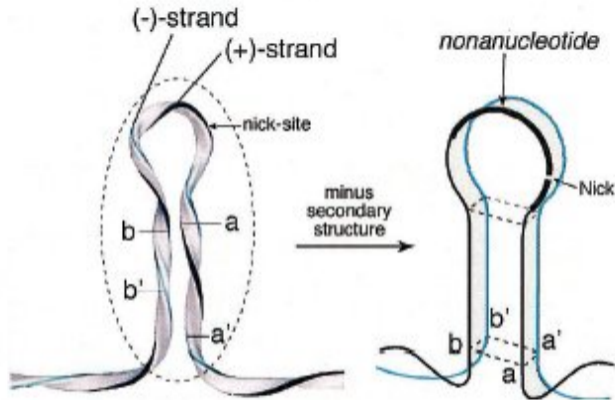

(i) Model

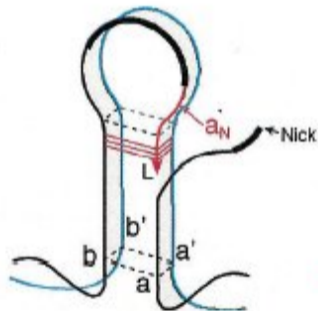

(ii) Initiation

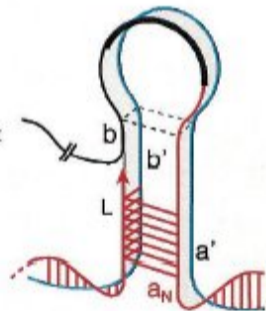

(iii) Termination

Supplement: MOESM5 [file 9608482]
